# Supplementary material
Source: Springer Nature journal article supplement (https://www.springermedizin.de/resource/supplementary/12889_2011_3978_MOESM3_ESM.pdf/9490788)

Table 2, Model 5  
2.18 (1.26/3.80)

Physical activity  
( $\geq 5$  times per  
week 30 min.)

Table 3, Model 5  
1.94 (1.73/2.18)

Neighborhood  
social capital

Table 3, Model 5  
1.58 (1.01/2.47)

(Self-rated)  
Health

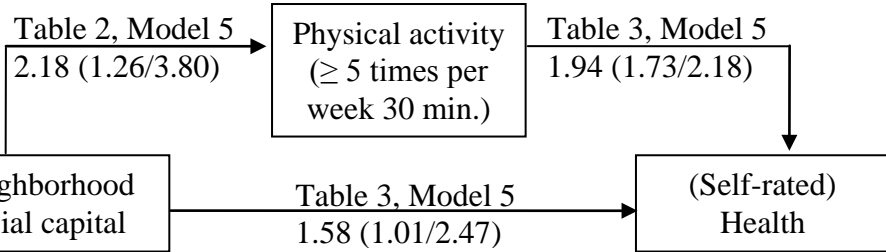

Supplement: MOESM3 [file 9490788]
